# Supplementary material for: Highly efficient production of 2,3-pentanedione from condensation of bio-derived lactic acid over polymorphic ZrO2
Source: Royal Society of Chemistry journal article supplement (doi:10.1039/d4gc02097a), 2024-01-01
Supplement: d4gc02097a1.pdf [file d4gc02097a1.pdf]

## Supporting information

### Selective production of 2,3 pentanedione from bio-derived lactic acid over polymorph $ZrO_2$

Neha Dhiman,<sup>a,b</sup> B Moses Abraham,<sup>c</sup> Deepti Agrawal,<sup>b,d</sup> Sudhakara Reddy Yenumala,<sup>b,e</sup> Jyoti Porwal,<sup>d</sup> and Bipul Sarkar<sup>\*a,b</sup>

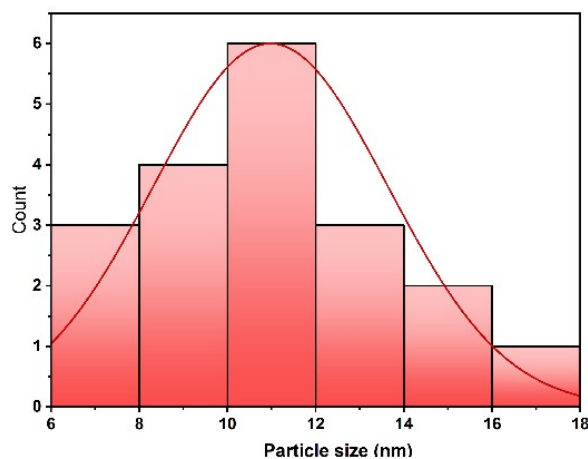

Figure S1. average particle size profile of  $ZrO_2$  catalyst calcined at 550°C.

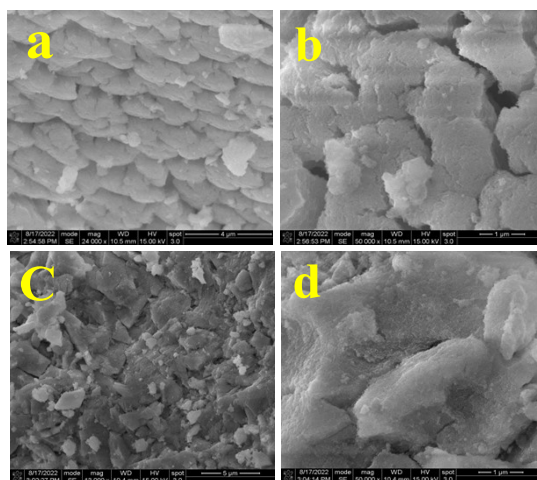

Figure S2: SEM image fresh (a,b) and spent (c, d) Zirconium oxide catalyst

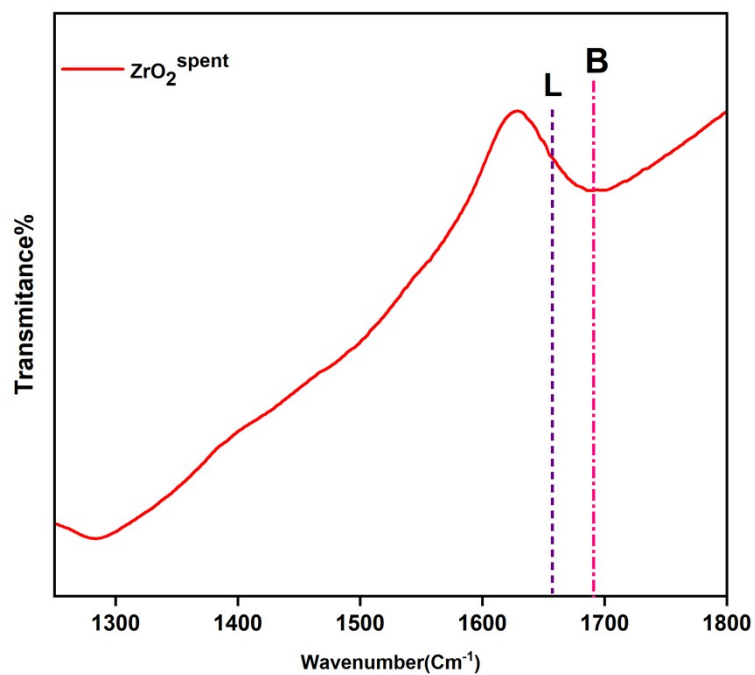

Figure S3: pyridine FTIR spectra of spent Zirconium oxide catalyst

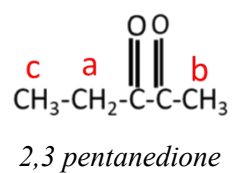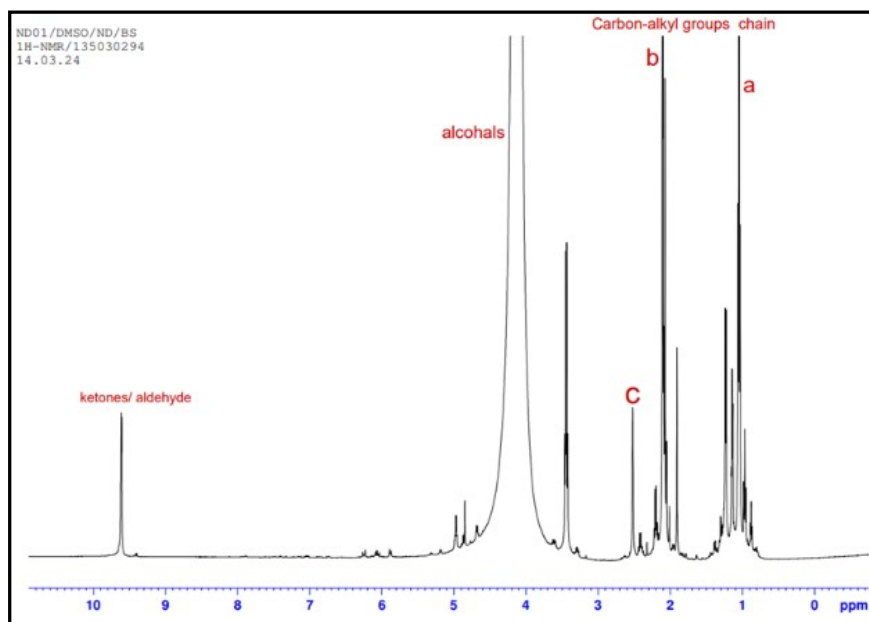

Figure S4. <sup>1</sup>H NMR of products of mixture

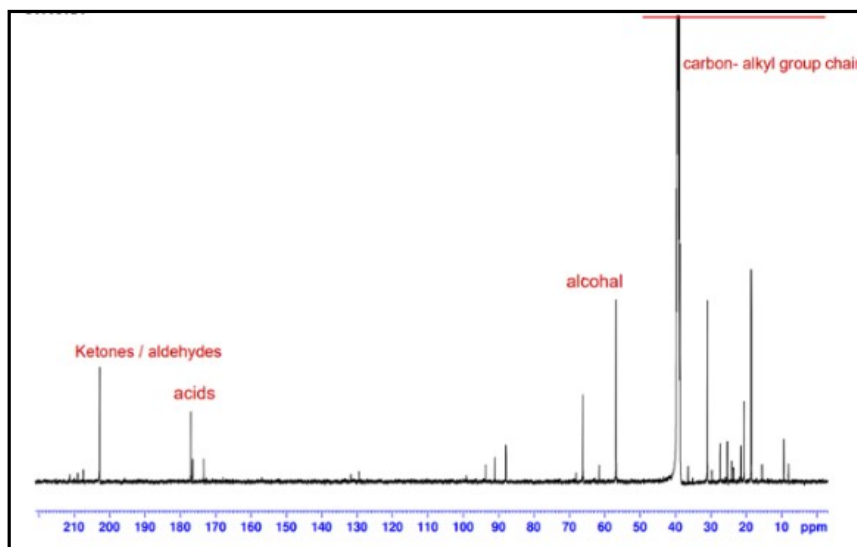

Figure S5.  $^{13}\text{C}$  NMR of products of mixture

Figure S3 shows  $^1\text{H}$ -NMR of 2,3-pentanedione. The peaks at chemical shifts 2.77, 2.33, and 1.09 ppm were attributed to the  $-\text{CH}_2$ (a),  $-\text{CH}_3$  (b), and  $-\text{CH}_3$  (c) groups due to the pentanedione moiety. It was evident that the synthesis of 2,3-pentanedione was successful because there was a ketone group region present at about 10 ppm. Similarly,  $^{13}\text{C}$ -NMR has shown (Figure S4) mainly two types of peaks in the range 0-38 and 200-210 ppm corresponding to the carbon-alkyl group chain of pentanedione and ketone and aldehyde groups. The peak at 170-180 ppm confirms the presence of an acid group present as a by-product in a mixture of products.

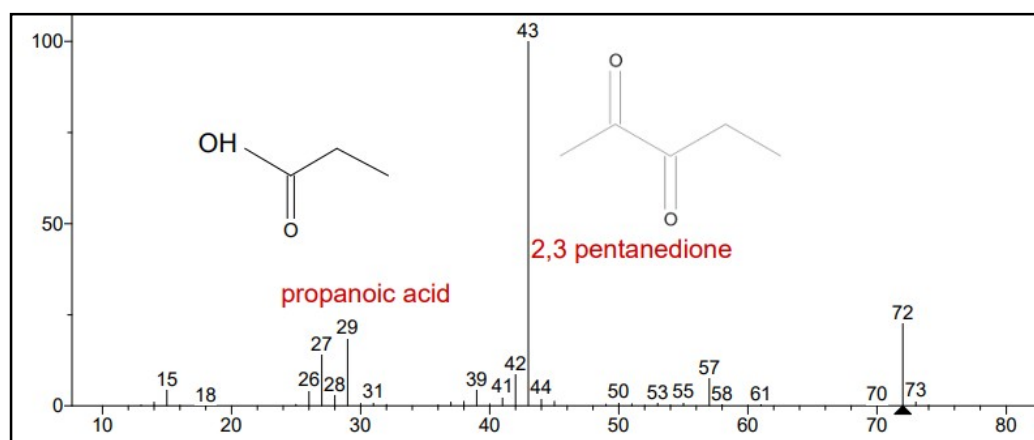

Figure S6: GC-MS data of products of mixture

The GC-MS of the product stream in Figure S5 clearly shows the presence of 2,3-pentanedione and propanoic acid at 43 and 29 retention times. The other groups of acids do not show any peaks in the spectra due to the lower amount of product and lower detection limit of the instrument. NMR and GC-MS give clear evidence of the selective presence of 2,3-pentanedione.

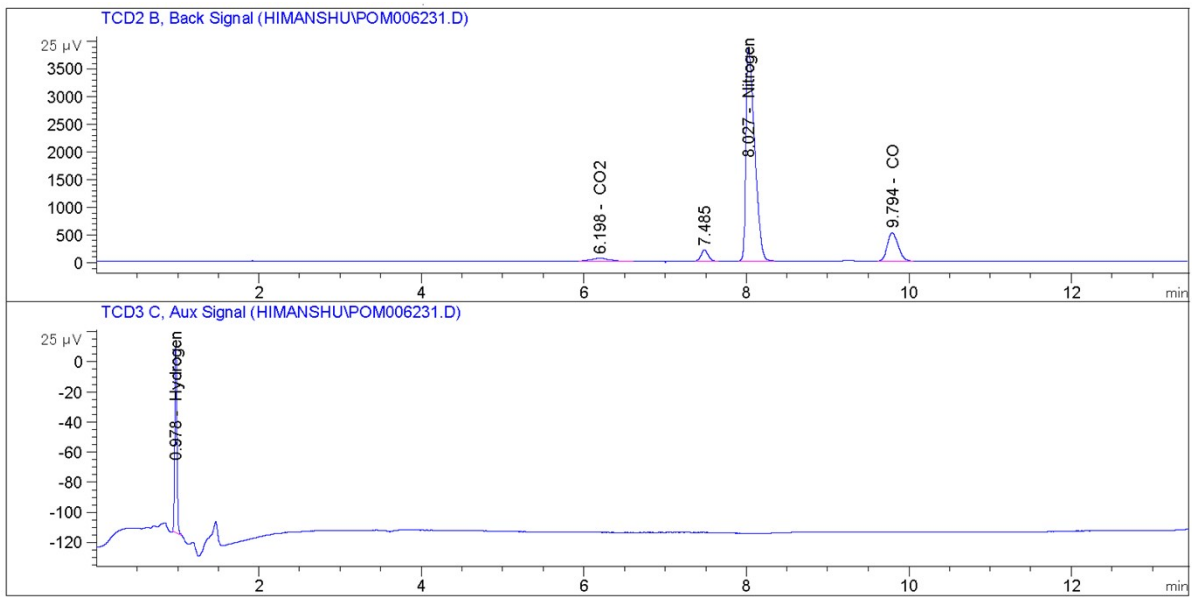

Figure S7 : GC profile of gas from condensation of LA to 2,3-pentanedione on the  $\text{ZrO}_2$  calcined at  $550^\circ\text{C}$

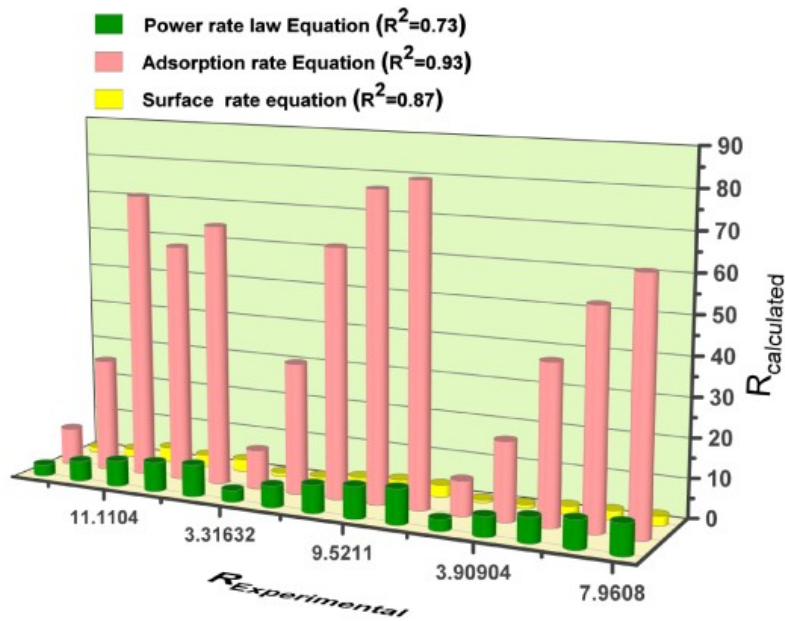

Figure S8. The plot of  $R_{\text{calculated}}$  Vs  $R_{\text{observed}}$  of the data taken between  $300\text{--}350^\circ\text{C}$

Furthermore, a few hypotheses were taken into account to simplify the reaction rate equations. The initial kinetics can, therefore be taken into account, and the partial pressure of the products can be assumed to be zero, i.e.,  $p_{(\text{C}_5\text{H}_8\text{O}_2)}$ ,  $p_{\text{CO}_2}$ , and  $p_{(\text{H}_2\text{O})} = 0$ . Additionally, the experiments were carried out with conversion and low PhE pressure (0.06 to 0.11 atm). It was determined from the aforementioned hypotheses that the desorption processes could not be the rate-limiting phase. When taking into account the initial kinetics, the rate expressions of the EQs-C (in SI) tend towards infinity, which implies that these fundamental reactions occur very quickly. So, it is possible to consider one of the aforementioned equations as the step that determines the rate.

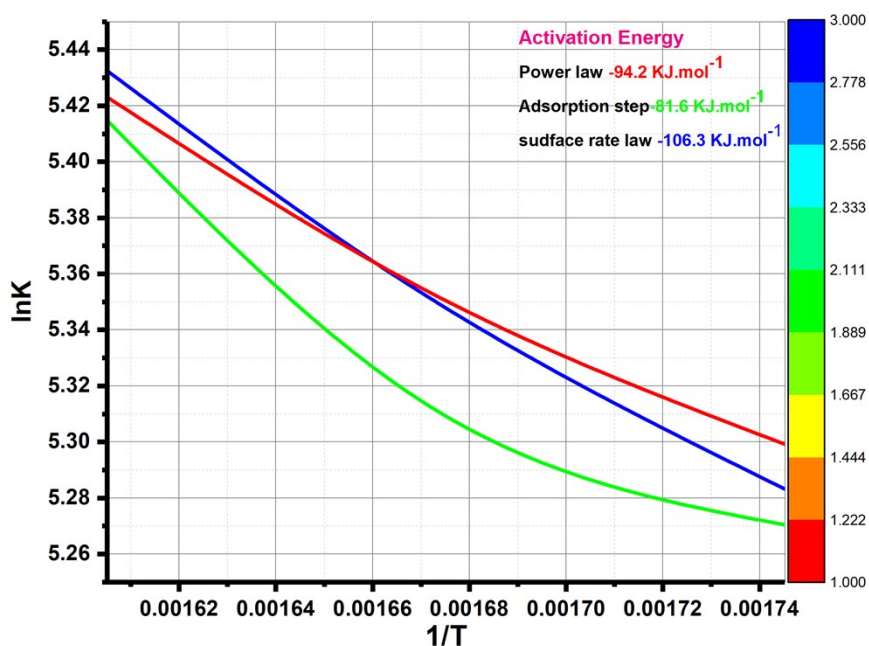

**Figure S9.** Arrhenius plot for the different reaction and their corresponding activation energy

**Table S1.** Comparison studies of our catalyst with reported catalysts.

| Catalyst                                                    | Conversion (%) | Selectivity (%) | Yield (%) | Reference |
|-------------------------------------------------------------|----------------|-----------------|-----------|-----------|
| Caesium-Doped Hydroxyapatite                                | 90             | 72.3            | 65.1      | 1         |
| CsOH/silica                                                 | 74             | 81              | 60        | 2         |
| CsNO <sub>3</sub> /SiO <sub>2</sub>                         | 99             | 80              | 54.1      | 3         |
| Ba <sub>2</sub> P <sub>2</sub> O <sub>7</sub> doped with Cs | 92             | 61.1            | 56.2      | 4         |
| Polymorphic ZrO <sub>2</sub>                                | 99.7           | 99.5            | 95.3      | This work |
| Commercial - ZrO <sub>2</sub>                               | 79.4           | 66.1            | 52.4      |           |

### Scherrer's Formula to Estimate average particle size

Scherrer equation (also referred to as the Debye–Scherrer equation) has been applied to estimate the size of particle size measurement or analysis. It is used to measure the size of crystals in the form of powder. The Scherrer equation can be written as:

$$t = [K \lambda] / \beta \cos \Theta$$

Where,

t = mean size of the crystalline domains

K = dimensionless shape factor (0.9)

$\lambda$  = X-ray wavelength (1.54Å)

$\beta$  = FWHM (full width at half max)

$\Theta$  = Bragg angle

Example

For  $2\Theta = 30.3$

$\cos(30.2/2) = 0.96547$

$\beta$  = FWHM = 0.90425 degree(from XRD data)

$$= (2\pi \times \text{degree} / 180) S$$

$$= 2 \times 3.14 \times 0.90425 / 180$$

$$= 0.03155 \text{ (radian)}$$

Therefore,  $t = [0.9 \times 1.54] / [0.03155 \times 0.96547]$   
 $= 1.386 / 0.0305$   
 $= 45.44 \text{ \AA}$   
 $= 4.5 \text{ nm}$   
 $t = 4.5 \text{ nm}$

For  $2\theta = 30.1$

$$\cos(30.1/2) = 0.96569$$

$$\beta = \text{FWHM} = 0.8331 \text{ degree (from XRD data)}$$

$$= (2\pi \times \text{degree} / 180)$$

$$= 2 \times 3.14 \times 0.8331 / 180$$

$$= 0.02906 \text{ (radian)}$$

Therefore,  $t = [0.9 \times 1.54] / [0.02906 \times 0.96569]$   
 $= 1.386 / 0.0281$   
 $= 49.32 \text{ \AA}$   
 $= 4.9 \text{ nm}$   
 $t = 5 \text{ nm}$

For  $2\theta = 60$

$$\cos(30) = 0.866025$$

$$\beta = \text{FWHM} = 1.9828 \text{ degree (from XRD data)}$$

$$= (2\pi \times \text{degree} / 180)$$

$$= 2 \times 3.14 \times 1.9828 / 180$$

$$= 0.06918 \text{ (radian)}$$

Therefore,  $t = [0.9 \times 1.54] / [0.06918 \times 0.866025]$   
 $= 1.386 / 0.0599$   
 $= 23.13 \text{ \AA}$   
 $t = 2.3 \text{ nm}$

For  $2\theta = 60$

$$\cos(30) = 0.866025$$

$$\beta = \text{FWHM} = 1.56485 \text{ degree (from XRD data)}$$

$$= (2\pi \times \text{degree} / 180)$$

$$= 2 \times 3.14 \times 1.56485 / 180$$

$$= 0.05459 \text{ (radian)}$$

Therefore,  $t = [0.9 \times 1.54] / [0.05459 \times 0.866025]$   
 $= 1.386 / 0.0472$   
 $= 29.36 \text{ \AA}$   
 $= 2.9 \text{ nm}$   
 $t = 3 \text{ nm}$

| Catalyst                          | Phase      | Bragg angle ( $\theta$ ) | $\beta$ (radian) | Particle size (nm) |
|-----------------------------------|------------|--------------------------|------------------|--------------------|
| ZrO <sub>2</sub>                  | Tetragonal | 30.2/2                   | 0.03155          | 4.5                |
| ZrO <sub>2</sub> <sup>Spent</sup> | Tetragonal | 30.1/2                   | 0.02906          | 5                  |
| ZrO <sub>2</sub>                  | Monoclinic | 60                       | 0.06918          | 2.3                |
| ZrO <sub>2</sub> <sup>Spent</sup> | Monoclinic | 60                       | 0.05459          | 3                  |

**Derivation of kinetic rate expressions of condensation of bio-derived lactic acid over  $ZrO_2$**

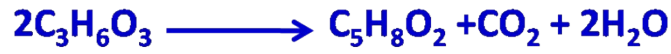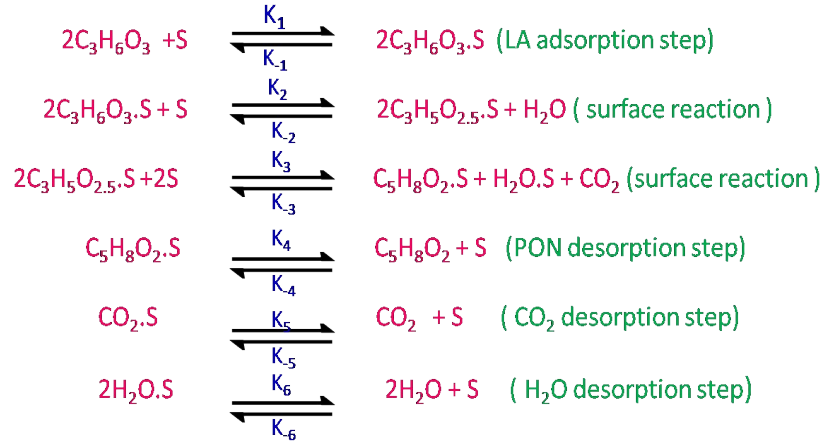

**1. Adsorption as a rate-determining step:**

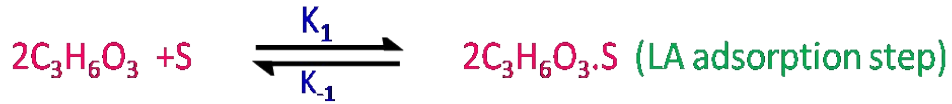

$$R_A = K_1 \cdot p_{C_3H_6O_3}^2 \cdot \theta_S - K_{-1} \cdot \theta_{C_3H_6O_3 \cdot S}^2$$

$$R_A = K_1 \left[ p_{C_3H_6O_3}^2 \cdot \theta_S - K_{-1} \cdot \frac{\theta_{C_3H_6O_3 \cdot S}^2}{K_1} \right]$$

$$R_A = K_1 \left[ p_{C_3H_6O_3}^2 \cdot \theta_S - \frac{\theta_{C_3H_6O_3 \cdot S}^2}{K_A} \right] \text{ where, } \{K_A = K_1/K_{-1}\} \quad (1)$$

By considering other elementary reaction steps to be very fast

$$R_{S1} = 0; R_{S2} = 0; R_{D1} = 0; R_{D2} = 0; R_{D3} = 0$$

$$\theta_{C_3H_6O_3 \cdot S}^2 = \frac{\theta_{C_3H_5O_{2.5} \cdot S}^2 \cdot \theta_{H_2O \cdot S}}{K_{S1} \cdot \theta_S} \quad (3)$$

$$\theta_{C_3H_5O_{2.5} \cdot S} = \left( \theta_{C_5H_8O_2 \cdot S} \cdot \theta_{H_2O} \cdot \frac{\theta_{CO_2}}{K_{S2} \cdot \theta_S} \right) \quad (4)$$

$$\theta_{C_5H_8O_2 \cdot S} = \frac{p_{C_5H_8O_2} \cdot \theta_S}{K_{D1}} \quad (5)$$

$$\theta_{HS} = \left( \frac{p_{CO_2}}{K_{D2}} \right) \cdot \theta_S \quad (6)$$

$$\theta_{HS} = \left( \frac{p_{H_2O}}{K_{D3}} \right) \cdot \theta_S \quad (7)$$

Total coverage sites

$$\theta_t = \theta_{C_3H_6O_3}^2 \cdot \theta_S + \theta_{C_3H_5O_2.5}^2 \cdot \theta_S + \theta_{C_5H_8O_2} \cdot \theta_S + \theta_{CO_2} \cdot \theta_S + \theta_{H_2O} \cdot \theta_S + \theta_S \quad (8)$$

$$\theta_S = \theta_t / \left[ \frac{p_{C_5H_8O_2} \cdot p_{CO_2} \cdot p_{H_2O}^2}{K_{S1} \cdot K_{S2} \cdot K_{D1} \cdot K_{D2} \cdot K_{D3}} \right] + \frac{[p_{C_5H_8O_2} \cdot p_{H_2O} \cdot p_{CO_2}]}{K_{S2} \cdot K_{D1} \cdot K_{D2} \cdot K_{D3}} + \frac{p_{C_5H_8O_2}}{K_{D1}} + \left( \frac{p_{CO_2}}{K_{D2}} \right) + \left( \frac{p_{H_2O}}{K_{D3}} \right) + 1] \quad (9)$$

From eqs (1), (2), (10)

$$R_A = K_1 \cdot \theta_S \left( p_{C_3H_6O_3}^2 - \frac{p_{C_5H_8O_2} \cdot p_{H_2O}^2 \cdot p_{CO_2}}{K_{S1} \cdot K_{S2} \cdot K_{D1} \cdot K_{D2}} \right)$$

Putting the value of  $\theta_S$  in equ(10)

$$R_A = \theta_t / \left[ \frac{p_{C_5H_8O_2} \cdot p_{CO_2} \cdot p_{H_2O}^2}{K_{S1} \cdot K_{S2} \cdot K_{D1} \cdot K_{D2} \cdot K_{D3}} \right] + \frac{[p_{C_5H_8O_2} \cdot p_{H_2O} \cdot p_{CO_2}]}{K_{S2} \cdot K_{D1} \cdot K_{D2} \cdot K_{D3}} + \frac{p_{C_5H_8O_2}}{K_{D1}} + \left( \frac{p_{CO_2}}{K_{D2}} \right) + \left( \frac{p_{H_2O}}{K_{D3}} \right) + 1] \left( p_{C_3H_6O_3}^2 - \frac{p_{C_5H_8O_2} \cdot p_{H_2O}^2 \cdot p_{CO_2}}{K_{S1} \cdot K_{S2} \cdot K_{D1} \cdot K_{D2}} \right) \quad (11)$$

Initial kinetics is considered then partial pressure of the products can be assumed as zero, i.e.,

$p_{C_5H_8O_2} = 0$ ,  $p_{H_2O} = 0$  and  $p_{CO_2} = 0$ . Then,

$$R_A = k_1 \cdot \theta_t \cdot p_{C_3H_6O_3}^2$$

$$R_A = k_A \cdot p_{C_3H_6O_3}^2$$

## 2a. Surface Reaction as Rate determining step

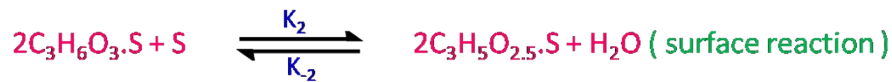

$$R_{S1} = k_2 \cdot \theta_{C_3H_6O_3}^2 \cdot \theta_S - k_{-2} \cdot \theta_{C_3H_5O_2.5}^2 \cdot \theta_{H_2O} \cdot \theta_S \quad (12)$$

$$R_{S1} = k_2 \left[ \theta_{C_3H_6O_3}^2 \cdot \theta_S - \frac{\theta_{C_3H_5O_2.5}^2 \cdot \theta_{H_2O} \cdot \theta_S}{K_{S1}} \right] \quad (12)$$

Total coverage sites:



$$\theta_S = \theta_t / [K_A p_{C_3H_6O_3} + \frac{[p_{C_5H_8O_2} \cdot p_{H_2O} \cdot p_{CO_2}]}{K_{S2} \cdot K_{D1} \cdot K_{D2} \cdot K_{D3}} + \frac{p_{C_5H_8O_2}}{K_{D1}} + \left(\frac{p_{CO_2}}{K_{D2}}\right) + \left(\frac{p_{H_2O}}{K_{D3}}\right) + 1] \quad (13)$$

From solve the above eqs (12), (13) and considered to be at initial kinetics the partial pressure of the products can be assumed as zero,  $p_{C_5H_8O_2} = 0$ ,  $p_{H_2O} = 0$  and  $p_{CO_2} = 0$ .

$$R_{S1} = \frac{K_2 \cdot \theta_t^2 \cdot K_A \cdot p_{C_3H_8}^2}{[1 + K_A p_{C_3H_8}^2]^2}$$

$$R_{S1} = \frac{k \cdot K_A \cdot p_{C_3H_8}^2}{[1 + K_A p_{C_3H_8}^2]^2} \text{ where, } K_2 \cdot \theta_t^2 = K \quad (14)$$

## 2b. Surface Reaction as Rate determining step

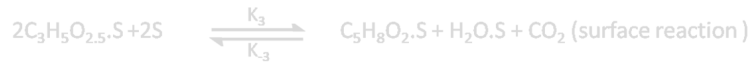

$$R_{S2} = k_3 \cdot \theta_{C_3H_5O_{2.5}S}^2 \cdot \theta_S^2 - k_{-3} \cdot \theta_{C_3H_8O_2S} \cdot \theta_{H_2OS} \cdot \theta_{CO_2S} \quad (15)$$

$$R_{S2} = k_3 \left[ \theta_{C_3H_5O_{2.5}S}^2 \cdot \theta_S^2 - \frac{\theta_{C_3H_8O_2S} \cdot \theta_{H_2OS} \cdot \theta_{CO_2S}}{K_{S2}} \right] \quad (16)$$

After solving for total coverage sites, the rate expression of the 2<sup>nd</sup> surface reaction step is found that **The rate expression will tend towards infinity**, which implies that this step can never be rate limiting step. When initial kinetics is considered and partial pressure of the products can be assumed as zero, i.e.,  $p_{C_5H_8O_2} = 0$ ,  $p_{H_2O} = 0$  and  $p_{CO_2} = 0$ .

## 3a. Desorption as Rate determining step:

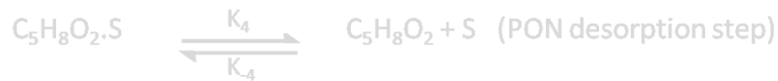

$$R_{D1} = k_4 \cdot \theta_{C_5H_8O_2S} \cdot \theta_S - k_{-4} \cdot p_{C_5H_8O_2} \cdot \theta_S \quad (17)$$

$$R_{D1} = k_4 \left[ \theta_{C_5H_8O_2S} - \frac{p_{C_5H_8O_2} \cdot \theta_S}{K_{D1}} \right] \quad (18)$$

After solving for total coverage sites, the rate expression of the 3<sup>rd</sup> surface reaction step is found that **The rate expression will tend towards infinity**, which implies that PON desorption step will not be very fast and will not affect the reaction kinetics. When initial kinetics is considered and partial pressure of the products can be assumed as zero, i.e.,  $p_{C_5H_8O_2} = 0$ ,  $p_{H_2O} = 0$  and  $p_{CO_2} = 0$ .

## 3b. Desorption as Rate determining step:

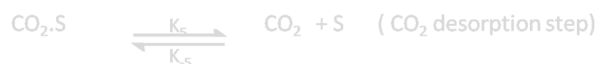

$$R_{D2} = k_5 \cdot \theta_{CO_2S} \cdot \theta_S - k_{-5} \cdot p_{CO_2} \cdot \theta_S \quad (19)$$

$$R_{D2} = k_5 \left[ \theta_{CO_2S} - \frac{p_{CO_2} \cdot \theta_S}{K_{D2}} \right] \quad (20)$$

When initial kinetics is considered and partial pressure of the products can be assumed as zero, i.e.,  $p_{C_3H_6}$  and  $p_{H_2} = 0$ . After solving for total coverage sites, the rate expression of the 3<sup>rd</sup>desorption reaction step is found that ,The overall rate expression will be infinity thus implies that the hydrogen desorption will be very fast and will not affect the reaction kinetics.

### 3C. Desorption as Rate determining step:

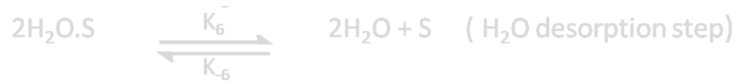

$$R_{D3} = k_6 \cdot (\theta_{H_2O}^2) - k_{-6} \cdot p_{H_2O} \cdot (\theta_S)^2 \quad (21)$$

$$R_{D3} = k_6 \left[ (\theta_{H_2O}^2) - \frac{p_{H_2O} \cdot (\theta_S)^2}{K_{D3}} \right] \quad (22)$$

When initial kinetics is considered and partial pressure of the products can be assumed as zero, i.e.,  $p_{C_3H_6}$  and  $p_{H_2} = 0$ . The overall rate expression after solving the above equation rate will be infinity thus implies that the water desorption will be very fast and will not affect the reaction kinetics.

### Calculation of activation energy and pre-exponential factor of the reactions

Arrhenius rate equation,

$$K = A \cdot e^{\frac{-E_a}{RT}} \quad (15)$$

The above equation was solved for simplified rate expression of the reactions, and the activation energy and Arrhenius constant were calculated as slope and intercept of 1/T versus ln(k).

Table S2. The rate and partial pressure at 300°C

| LAflow rate (ml/hr) | Partial Pressure of LA (atm) | LA rate(micromole/sec) | fractional conversion of LA | Rate of consumption of LA (micromole /gm) | LA (R <sub>LA</sub> ) |
|---------------------|------------------------------|------------------------|-----------------------------|-------------------------------------------|-----------------------|
| 1                   | 0.065845847                  | 3.76                   | 0.882                       | 3.31632                                   |                       |
| 2                   | 0.089301762                  | 7.46                   | 0.806                       | 6.01276                                   |                       |
| 3                   | 0.101334361                  | 11.2                   | 0.792                       | 8.8704                                    |                       |
| 4                   | 0.108654461                  | 14.9                   | 0.639                       | 9.5211                                    |                       |
| 5                   | 0.113577151                  | 18.6                   | 0.485                       | 9.021                                     |                       |

Table S3. The rate and partial pressure at 325°C

| LA flow rate (ml/hr) | Partial Pressure of LA (atm) | LA rate (micromole/sec) | flow fractional conversion LA | Rate of consumption of LA (micromole /gm) | LA (R <sub>LA</sub> ) |
|----------------------|------------------------------|-------------------------|-------------------------------|-------------------------------------------|-----------------------|
| 1                    | 0.065845847                  | 3.76                    | 0.872                         | 3.27872                                   |                       |
| 2                    | 0.089301762                  | 7.46                    | 0.752                         | 5.60992                                   |                       |
| 3                    | 0.101334361                  | 11.2                    | 0.992                         | 11.1104                                   |                       |
| 4                    | 0.108654461                  | 14.9                    | 0.542                         | 8.0758                                    |                       |
| 5                    | 0.113577151                  | 18.6                    | 0.439                         | 8.1654                                    |                       |

Table S4. The rate and partial pressure at 350°C

| LA flow rate (ml/hr) | Partial Pressure of LA (atm) | LA rate (micromole/sec) | flow fractional conversion LA | Rate of consumption of LA (micromole /gm) | LA (R <sub>LA</sub> ) |
|----------------------|------------------------------|-------------------------|-------------------------------|-------------------------------------------|-----------------------|
| 1                    | 0.065845847                  | 3.76                    | 0.814                         | 3.06064                                   |                       |
| 2                    | 0.089301762                  | 7.46                    | 0.524                         | 3.90904                                   |                       |
| 3                    | 0.101334361                  | 11.2                    | 0.559                         | 6.2608                                    |                       |
| 4                    | 0.108654461                  | 14.9                    | 0.502                         | 7.4798                                    |                       |
| 5                    | 0.113577151                  | 18.6                    | 0.428                         | 7.9608                                    |                       |

Table S5. R<sub>observed</sub> and R<sub>calculated</sub> using different elementary reaction steps

| R <sub>Experimental</sub> | R <sub>calculated</sub> (Power rate law equation) | R <sub>calculated</sub> (Adsorption rate equation) | R <sub>calculated</sub> (Surface equation) | rate |
|---------------------------|---------------------------------------------------|----------------------------------------------------|--------------------------------------------|------|
| 3.27872                   | 2.88559                                           | 9.46104                                            | 1.38292                                    |      |
| 5.60992                   | 5.16087                                           | 28.95209                                           | 2.14952                                    |      |
| 11.1104                   | 6.5685                                            | 72.97865                                           | 3.79711                                    |      |
| 8.0758                    | 7.50345                                           | 60.59637                                           | 3.05332                                    |      |
| 8.1654                    | 8.1654                                            | 66.67376                                           | 3.15448                                    |      |
| 3.31632                   | 3.0287                                            | 10.04413                                           | 0.9598                                     |      |
| 6.01276                   | 5.57422                                           | 33.51643                                           | 1.23037                                    |      |
| 8.8704                    | 7.17938                                           | 63.684                                             | 2.50568                                    |      |
| 3.14366                   | 8.25523                                           | 78.59891                                           | 3.15184                                    |      |
| 3.422844                  | 9.021                                             | 81.37844                                           | 3.18512                                    |      |

|          |         |          |         |
|----------|---------|----------|---------|
| 1.003104 | 2.9403  | 8.9992   | 0.80191 |
| 1.239414 | 5.13052 | 20.05541 | 1.02243 |
| 1.898578 | 6.46335 | 40.46574 | 2.03135 |
| 2.44816  | 7.34174 | 54.91475 | 2.37385 |
| 2.485968 | 7.9608  | 63.37434 | 2.45794 |

**Table S6.** Heats of reaction for the conversion of La into chemicals

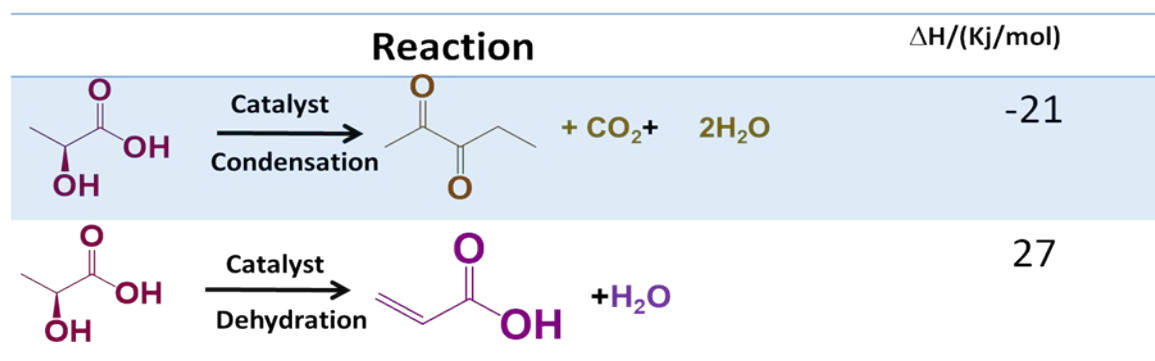

## References

1. X. Li, L. Sun, W. Zou, P. Cao, Z. Chen, C. Tang and L. Dong, *ChemCatChem*, 2017, **9**, 4621-4627.
2. M. S. Tam, J. E. Jackson and D. J. Miller, *Industrial & engineering chemistry research*, 1999, **38**, 3873-3877.
3. L.-W. SUN, X.-L. LI and C.-M. TANG, *Acta Physico-Chimica Sinica*, 2016, **32**, 2327-2336.
4. X. Li, Y. Zhang, Z. Chen, P. Cao, W. Zou, C. Tang, L. Dong and Y. Wang, *Industrial & Engineering Chemistry Research*, 2017, **56**, 14437-14446.
